# Supplementary material
Source: publisher figshare collection journal article supplement (https://karger.figshare.com/ndownloader/files/14801558)
Supplement: Supplementary file 1 [file 14801558]

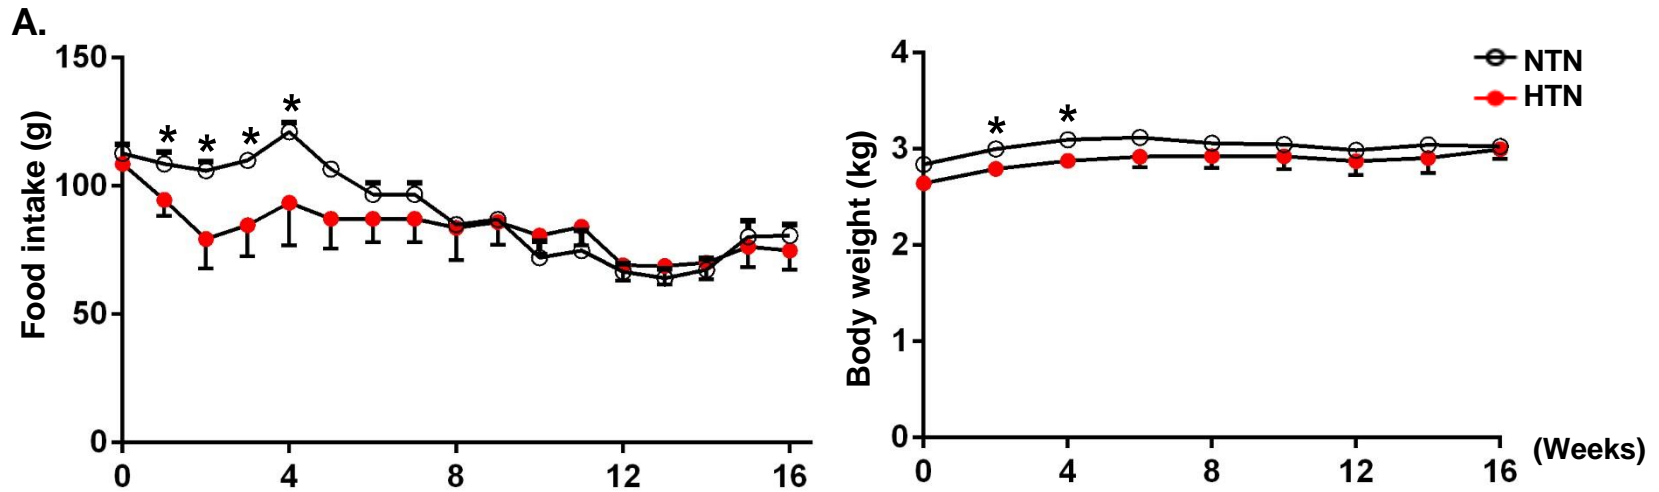

**Figure-S1.** Food consumption and body weight during the experiment. Values are mean  $\pm$  SEM, n=10 and 7 for normotensive and hypertensive groups, respectively. \*p<0.05 vs. normotensive rabbits.

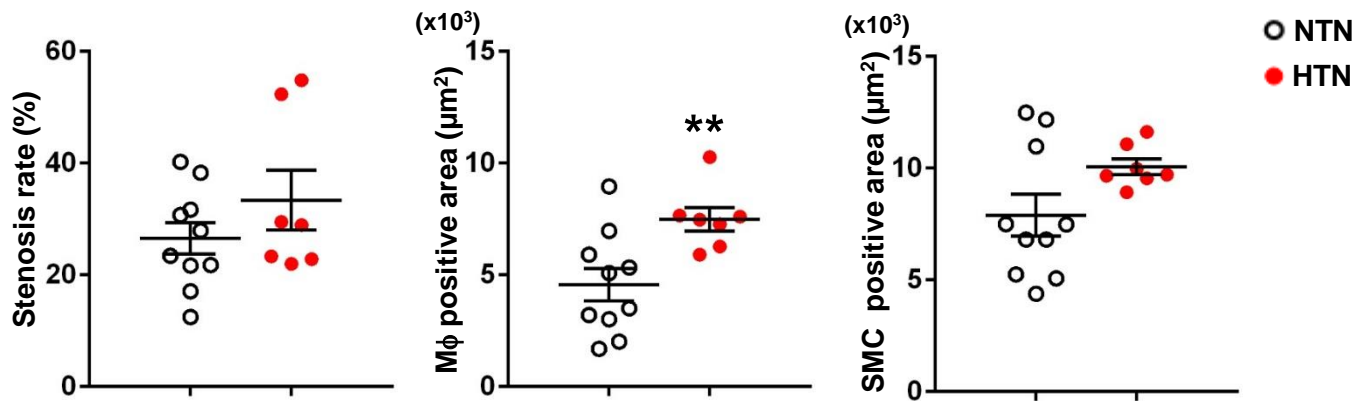

**Figure-S2.** Microscopic analysis of right coronary atherosclerosis in hypertensive and normotensive rabbits. Stenosis rate was calculated as intimal lesion area /lumen area. Intimal lesion area and lumen area was measured under EVG staining and M $\phi$  positive area and SMC positive area were measured using immunohistochemical stained specimens. Values are mean  $\pm$  SEM, n=10 and 7 for normotensive and hypertensive groups, respectively. \*\*p<0.01 vs. normotensive rabbits.

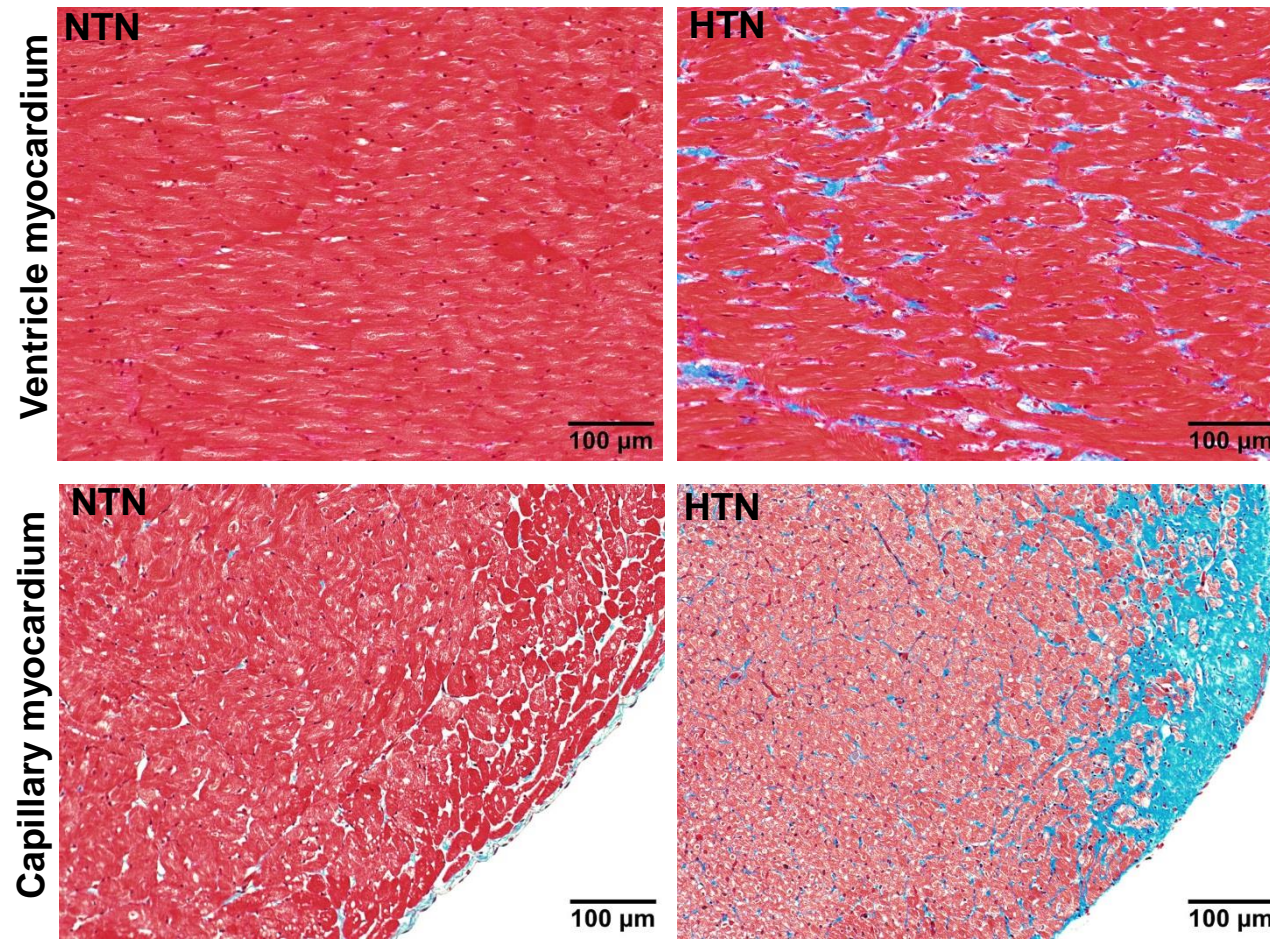

**Figure-S3.** The block V of heart sections was stained with Masson trichrome and fibrotic foci was stained in blue. Representative images of left ventricle myocardium and capillary myocardium were shown.
